# Supplementary material
Source: PubMed Central journal article supplement (PMC3301992)
Supplement: supp_jn.111.148874_nut148874-SFig1.pdf [file supp_jn.111.148874_nut148874-SFig1.pdf]

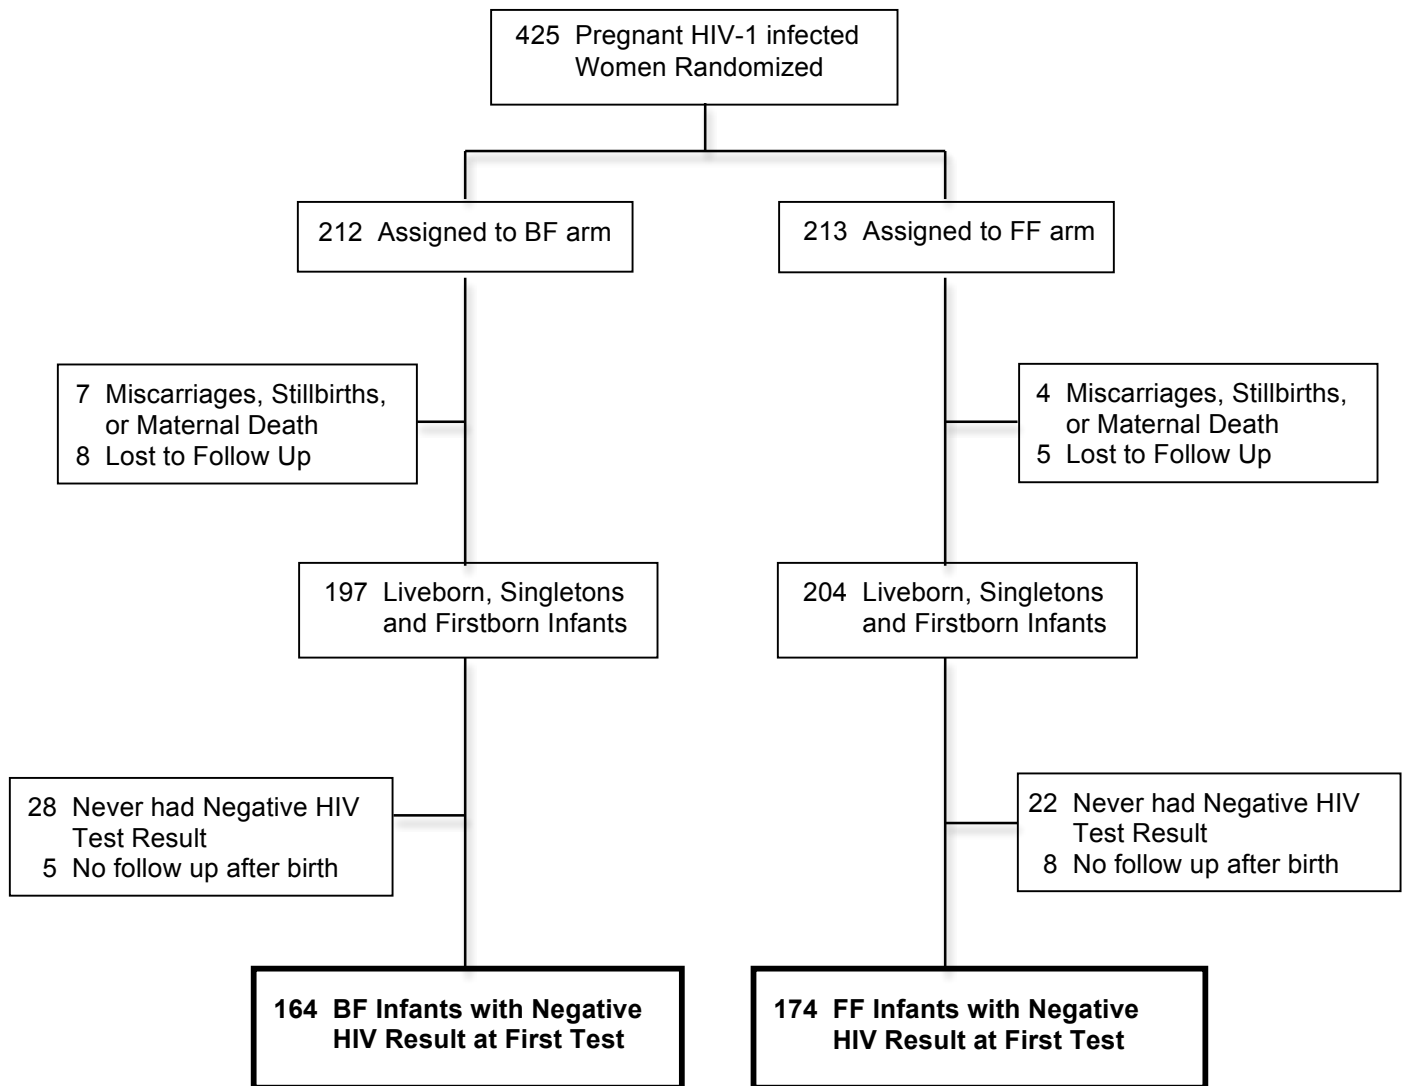

**SUPPLEMENTAL FIGURE 1.** Flow chart of HIV-1 infected women randomly assigned to BF and FF arm and the number of infants with HIV negative test result at first test included in the analysis based on randomization arm. BF, breastfeeding; FF, formula feeding.
