# Supplementary material
Source: PubMed Central journal article supplement (PMC3301992)
Supplement: supp_jn.111.148874_nut148874-SFig2.pdf [file supp_jn.111.148874_nut148874-SFig2.pdf]

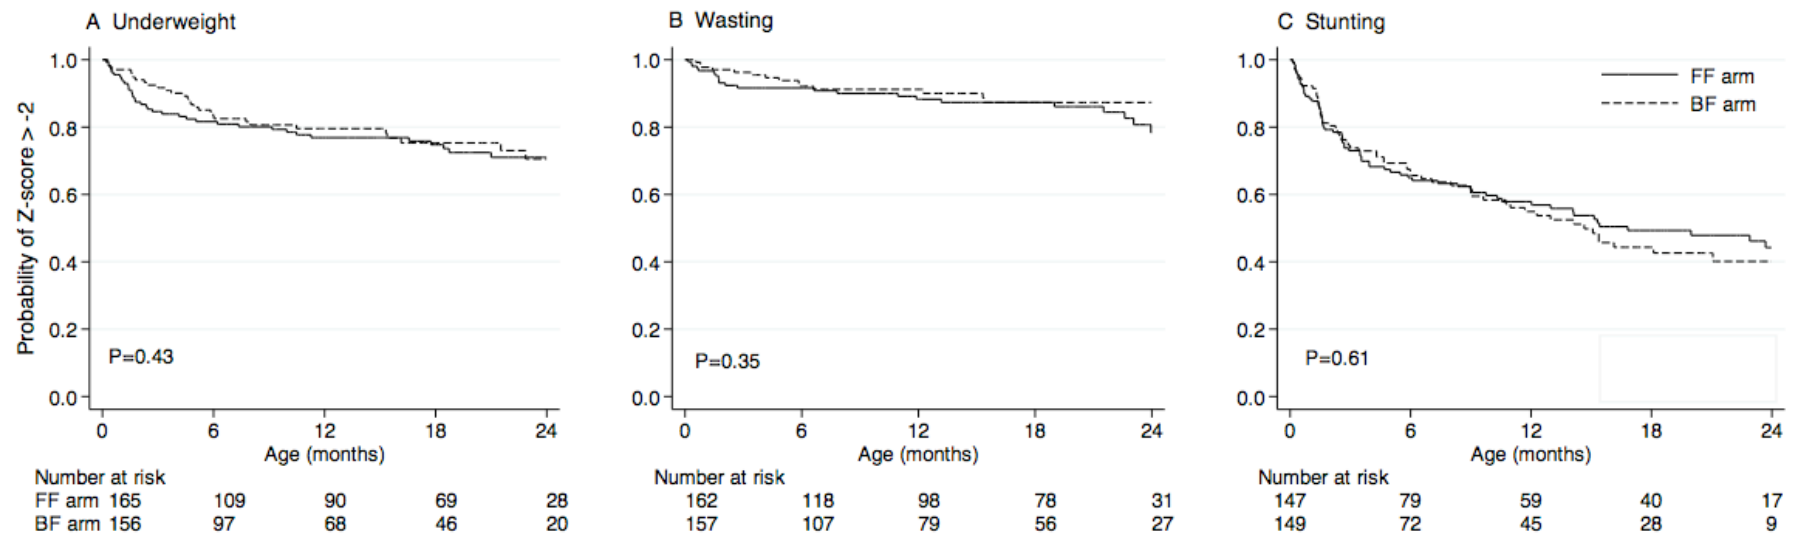

**SUPPLEMENTAL FIGURE 2.** Growth faltering in EU infants by randomization to BF (dashed line) or FF (solid line) arm. Sample sizes at 6-mo age intervals are shown below each graph. BF, breastfeeding; EU, HIV-1-exposed uninfected; FF, formula feeding.
